# Supplementary material
Source: publisher figshare collection journal article supplement (https://gsajournals.figshare.com/ndownloader/files/25768556)
Supplement: Supplementary file 1 [file 25768556]

**Supplementary image file: Figure_S3.pdf**

**
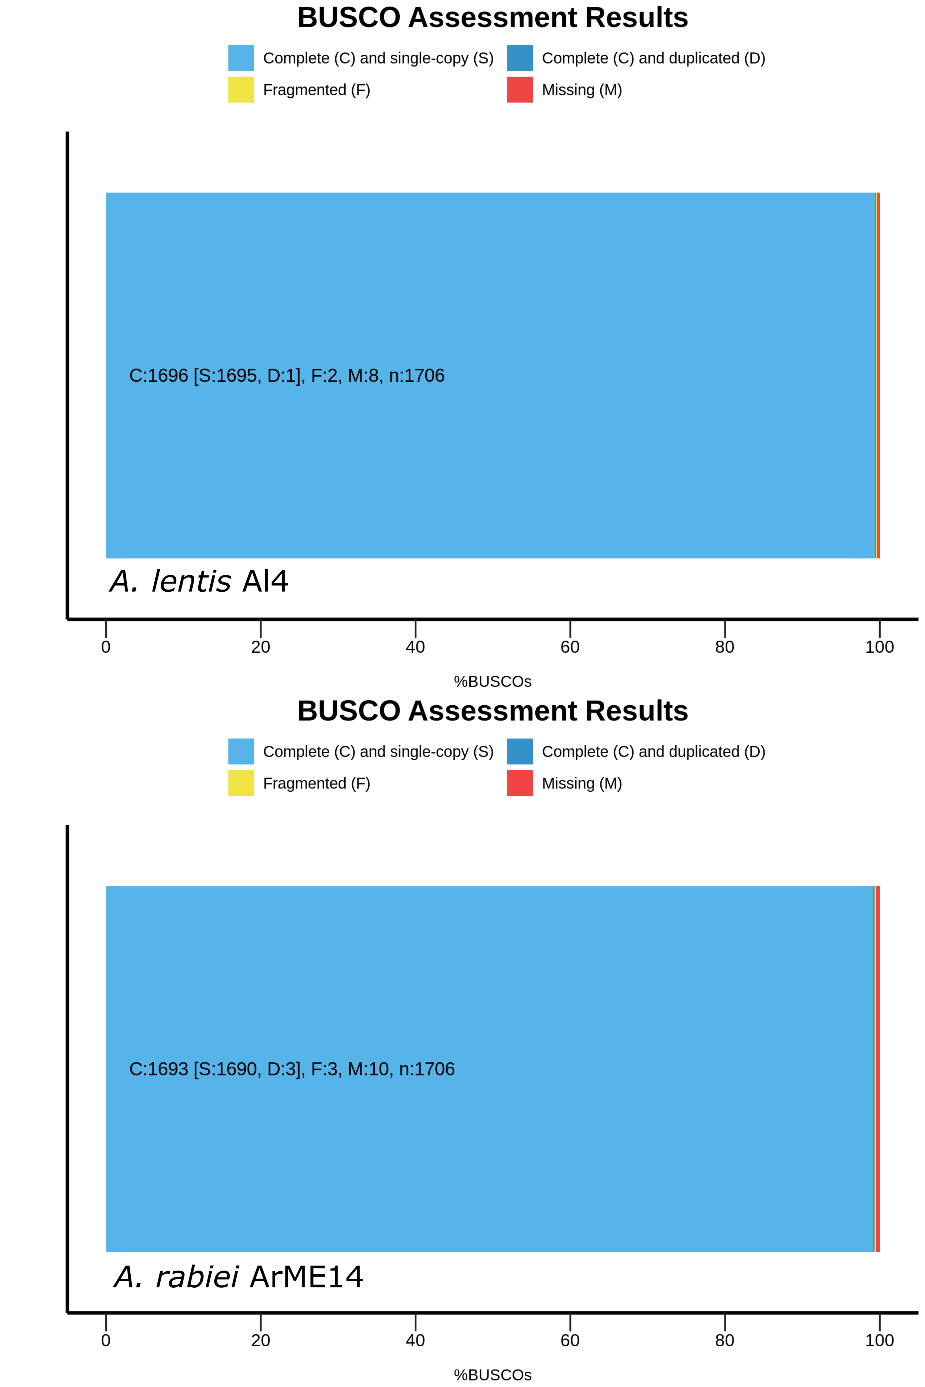
**Assessment of genome assembly and annotation completeness for the *A. lentis* Al4 reference genome assembly (top) and comparison with the published *A. rabiei* assembly for isolate ArME14 (bottom), using BUSCO v4.1.4. BUSCO was run using annotated protein files with graphical output within BUSCO by implementation of ggplot in R. For benchmarking of Al4 annotated assemblies against the BUSCO ascomycota_odb10 single-copy orthologs file for 1,706 proteins, 1,695 proteins were matched and single-copy, one was complete and duplicated, two annotations were fragmented and eight proteins were missing. By comparison, the reference *A. rabiei* ArME14 genome assembly had slightly lower annotation completeness.
